# Supplementary material
Source: PubMed Central journal article supplement (PMC3028148)
Supplement: NIHMS238915-supplement-01.pdf [file NIHMS238915-supplement-01.pdf]

**Table S1. Representative Images of Axon Mistargeting Phenotypes of 21 ORN Classes, Related to Figure 2 and Table 1.**

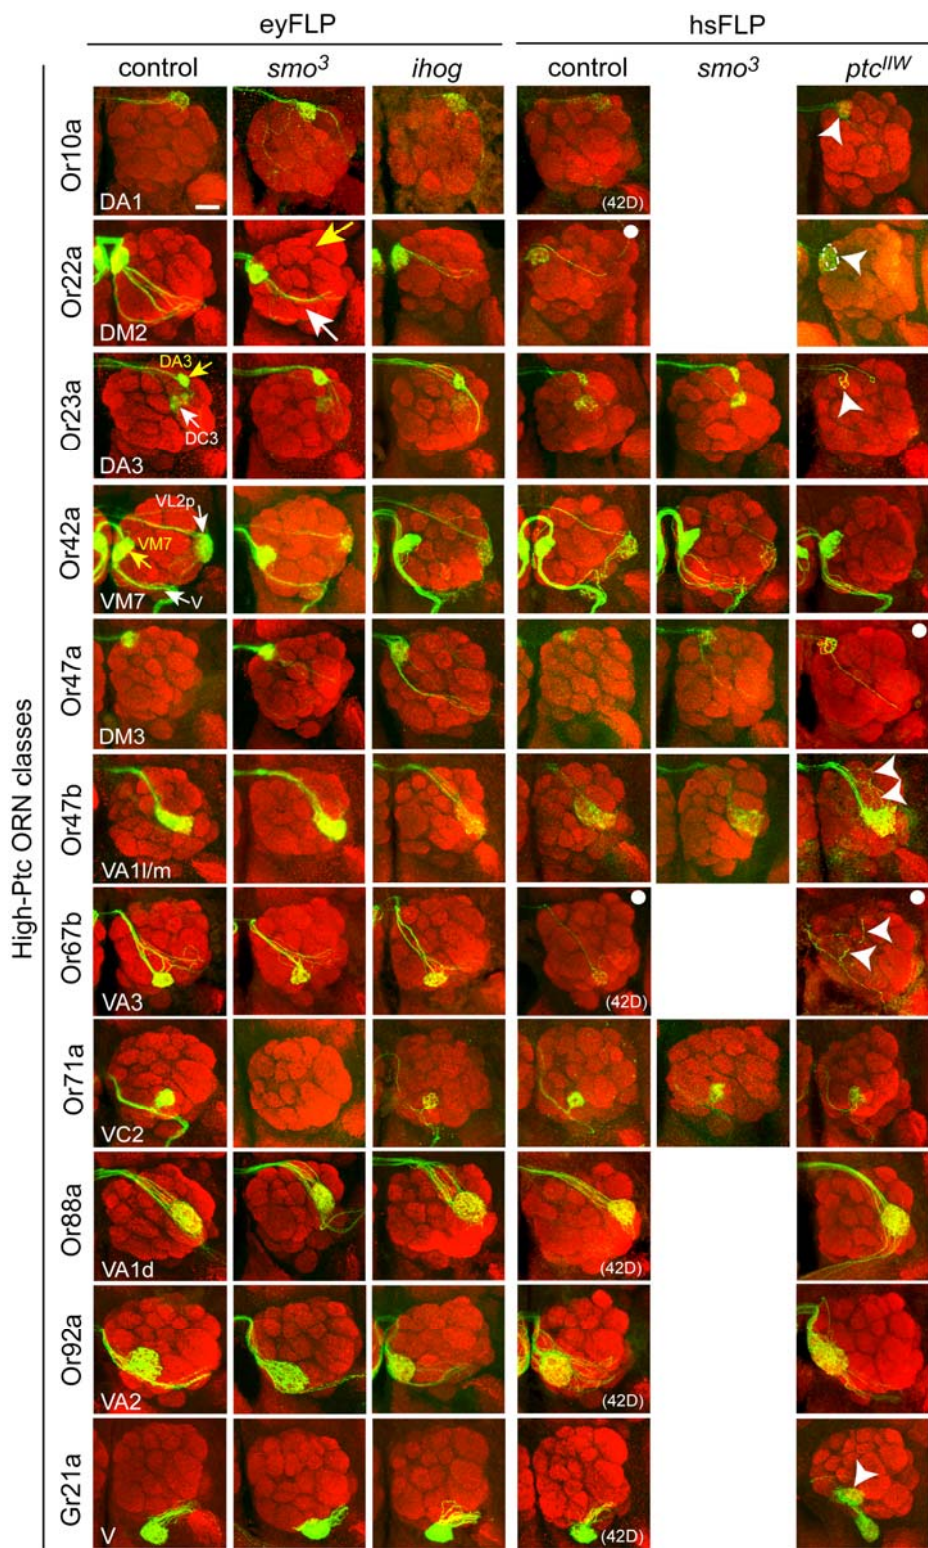

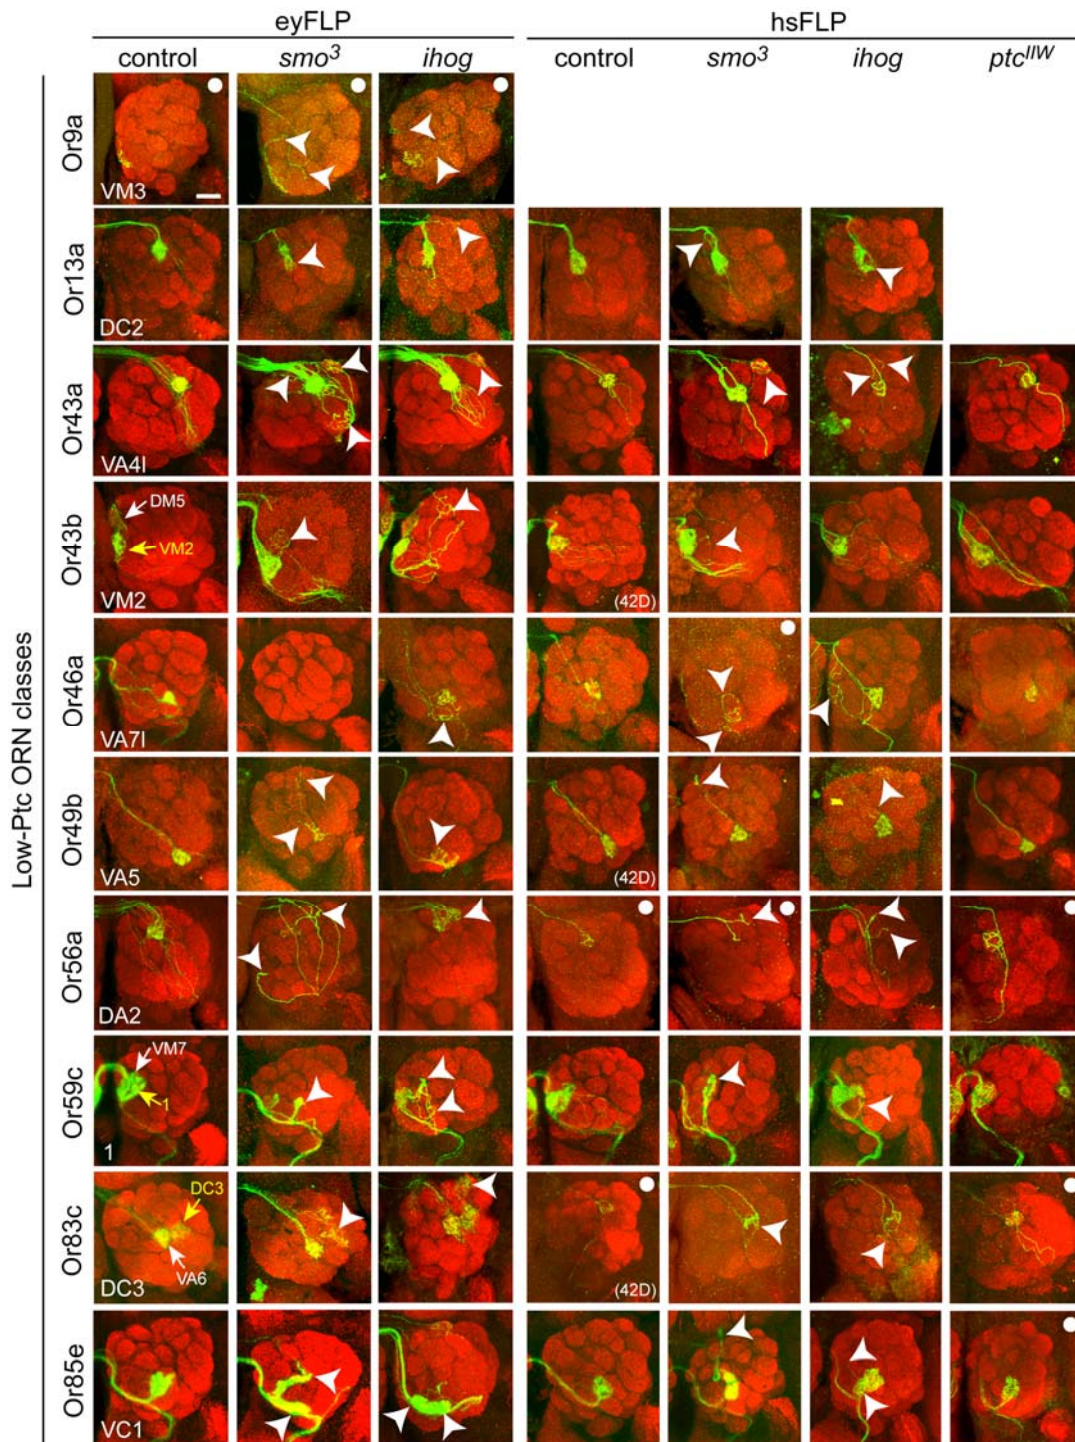

Single cell clone images are highlighted by dots on the upper right corner. Arrowheads point to ORN axon targeting defects. Some Or-Gal4s also label secondary glomeruli due to ectopic expression of Or-Gal4 in another ORN class in controls; in these cases, both normal target (yellow arrows) and secondary glomeruli (white arrows) are indicated. Control: *hs-FLP*-induced clones generated using chromosomes containing FRT40A (when not indicated) or FRT42D (as indicated) alone. Scale bars, 20  $\mu$ m. Genotypes are similar to Figure 2 that are described in Table S2.
