# Supplementary material
Source: PubMed Central journal article supplement (PMC3028148)
Supplement: NIHMS238915-supplement-02.pdf [file NIHMS238915-supplement-02.pdf]

**Table S2. Genotypes for All Experiments Described in Figures 1-6**

| Figure                                    | Genotype                                                                                                                                                                                                                                                                                                                                                                                                                                                                                                                                                         |
|-------------------------------------------|------------------------------------------------------------------------------------------------------------------------------------------------------------------------------------------------------------------------------------------------------------------------------------------------------------------------------------------------------------------------------------------------------------------------------------------------------------------------------------------------------------------------------------------------------------------|
| Fig. 1B                                   | <i>peb-Gal4; FRTG13 UAS-mCD8GFP</i>                                                                                                                                                                                                                                                                                                                                                                                                                                                                                                                              |
| Fig. 1C                                   | <i>ey-FLP/+; FRT42D ubi-GFPX2/+</i>                                                                                                                                                                                                                                                                                                                                                                                                                                                                                                                              |
| Fig. 1D                                   | <i>ey-FLP/+; ubi-GFPX2 FRT40A/+</i>                                                                                                                                                                                                                                                                                                                                                                                                                                                                                                                              |
| Fig. 1E                                   | <i>hh<sup>AC</sup>/hh<sup>ts2</sup></i>                                                                                                                                                                                                                                                                                                                                                                                                                                                                                                                          |
| Fig. 1F                                   | <i>ey-FLP/+; FRT42D ptc<sup>IIIW</sup>/FRT42D ubi-GFPX2</i>                                                                                                                                                                                                                                                                                                                                                                                                                                                                                                      |
| Fig. 1G, 1H                               | <i>ey-FLP/+; smo<sup>3</sup> FRT40A/ubi-GFPX2 FRT40A</i>                                                                                                                                                                                                                                                                                                                                                                                                                                                                                                         |
| Fig. 1I, 1J                               | <i>ptc-Gal4 UAS-GFPnls/+; hh<sup>P30</sup>/+</i>                                                                                                                                                                                                                                                                                                                                                                                                                                                                                                                 |
| Fig. 2B (left to right)                   | (control) <i>ey-FLP UAS-mCD8GFP/+; FRT40A/tubP-Gal80 FRT40A; Or-Gal4/+</i><br><i>(smo<sup>3</sup>) ey-FLP UAS-mCD8GFP/+; smo<sup>3</sup> FRT40A/tubP-Gal80 FRT40A; Or-Gal4/+</i><br><i>(ihog) ey-FLP UAS-mCD8GFP/+; ihog FRT40A/tubP-Gal80 FRT40A; Or-Gal4/+</i><br>(control) <i>hs-FLP UAS-mCD8GFP/+; FRT40A/tubP-Gal80 FRT40A; Or-Gal4/+</i><br><i>(smo<sup>3</sup>) hs-FLP UAS-mCD8GFP/+; smo<sup>3</sup> FRT40A/tubP-Gal80 FRT40A; Or-Gal4/+</i><br><i>(ptc<sup>IIIW</sup>) hs-FLP UAS-mCD8GFP/+; FRT42D ptc<sup>IIIW</sup>/FRT42D tubP-Gal80; Or-Gal4/+</i> |
| Fig. 3A                                   | (left) <i>ptc-Gal4 UAS-mCD8GFP/repo-Gal80</i><br>(right) <i>en-Gal4/UAS-mCD8GFP</i>                                                                                                                                                                                                                                                                                                                                                                                                                                                                              |
| Fig. 4A                                   | (top row) <i>peb-Gal4; FRTG13 UAS-mCD8GFP</i><br>(middle row) <i>peb-Gal4/+; FRTG13 UAS-mCD8GFP/+; UAS-hhRNAiN.23-2A/+</i><br>(bottom row) <i>elav-Gal4/ey<sup>3.5</sup>-Gal80; tubP-Gal80<sup>ts</sup>/+; UAS-hhRNAiN.23-2A/+</i>                                                                                                                                                                                                                                                                                                                               |
| Fig. 4C                                   | (left panels)<br><i>ey<sup>3.5</sup>-Gal80/elav-Gal4; Or-CD8GFP/tubP-Gal80<sup>ts</sup></i> (or <i>Or-rCD2</i> )<br><i>ey<sup>3.5</sup>-Gal80/elav-Gal4; tubP-Gal80<sup>ts</sup>/+; Or-CD8GFP/+</i><br>(Or46a-CD8GFP and Or85e-CD8GFP are on Chromosome III)<br>(right panels)<br><i>ey<sup>3.5</sup>-Gal80/elav-Gal4; Or-CD8GFP/tubP-Gal80<sup>ts</sup>; UAS-hhRNAiN.23-2A/+</i> (or <i>Or-rCD2</i> )<br><i>ey<sup>3.5</sup>-Gal80/elav-Gal4; tubP-Gal80<sup>ts</sup>/+; UAS-hhRNAiN.23-2A/Or-CD8GFP.</i>                                                       |
| Fig. 5A                                   | (left 3 panels) <i>peb-Gal4; FRTG13 UAS-mCD8GFP</i><br>(right 3 panels) <i>peb-Gal4/+; +/+; UAS-ptcJ B1/+</i>                                                                                                                                                                                                                                                                                                                                                                                                                                                    |
| Fig. 5B (left to right)                   | <i>peb-Gal4; Or-CD8GFP/+</i> (Or46a-CD8GFP and Or85e-CD8GFP are on Chromosome III)<br><i>peb-Gal4/+; Or-CD8GFP/+; UAS-ptcJ B1/+</i><br><i>peb-Gal4/UAS-ptc<sup>Δloop2</sup>; Or-CD8GFP/+</i><br><i>en-Gal4/ Or-CD8GFP</i><br><i>UAS-ptc<sup>Δloop2</sup>/+; Or-CD8GFP/en-Gal4</i>                                                                                                                                                                                                                                                                                |
| Fig. 6B, 6C <sub>1</sub> -6C <sub>3</sub> | (Or43a, Or85e, Or22a, Or47b and Or67b)<br><i>ey-FLP UAS-mCD8GFP/+; Or-Gal4/+; FRT82B hh<sup>ts2</sup>/FRT82B cl</i><br>(Or46a)<br><i>ey-FLP/+; FRT82B hh<sup>ts2</sup> Or46a-mCD8GFP/FRT82B cl</i>                                                                                                                                                                                                                                                                                                                                                               |
| Fig. 6C <sub>4</sub> (left to right)      | <i>ey-FLP /peb-Gal4; UAS-ptc/+; FRT82B hh<sup>ts2</sup> Or22a-CD8GFP/FRT82B cl</i><br><i>ey-FLP /peb-Gal4; Or47b-rCD2/+; FRT82B hh<sup>ts2</sup> UAS-ptcJ B1/FRT82B cl</i><br><i>ey-FLP /peb-Gal4; Or67b-CD8GFP/+; FRT82B hh<sup>ts2</sup> UAS-ptcJ B1/FRT82B cl</i>                                                                                                                                                                                                                                                                                             |
